# Supplementary figures and images for: Wet-chemical templateless assembly of metal nanowires from nanoparticles
Source: Royal Society of Chemistry journal article supplement (doi:10.1039/b414447n), 2005-01-01

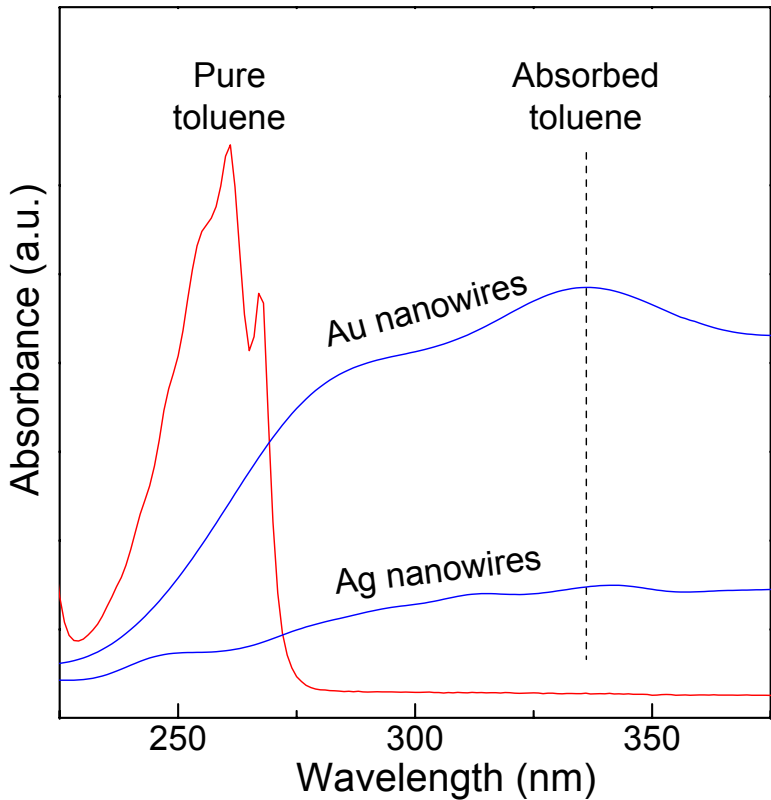

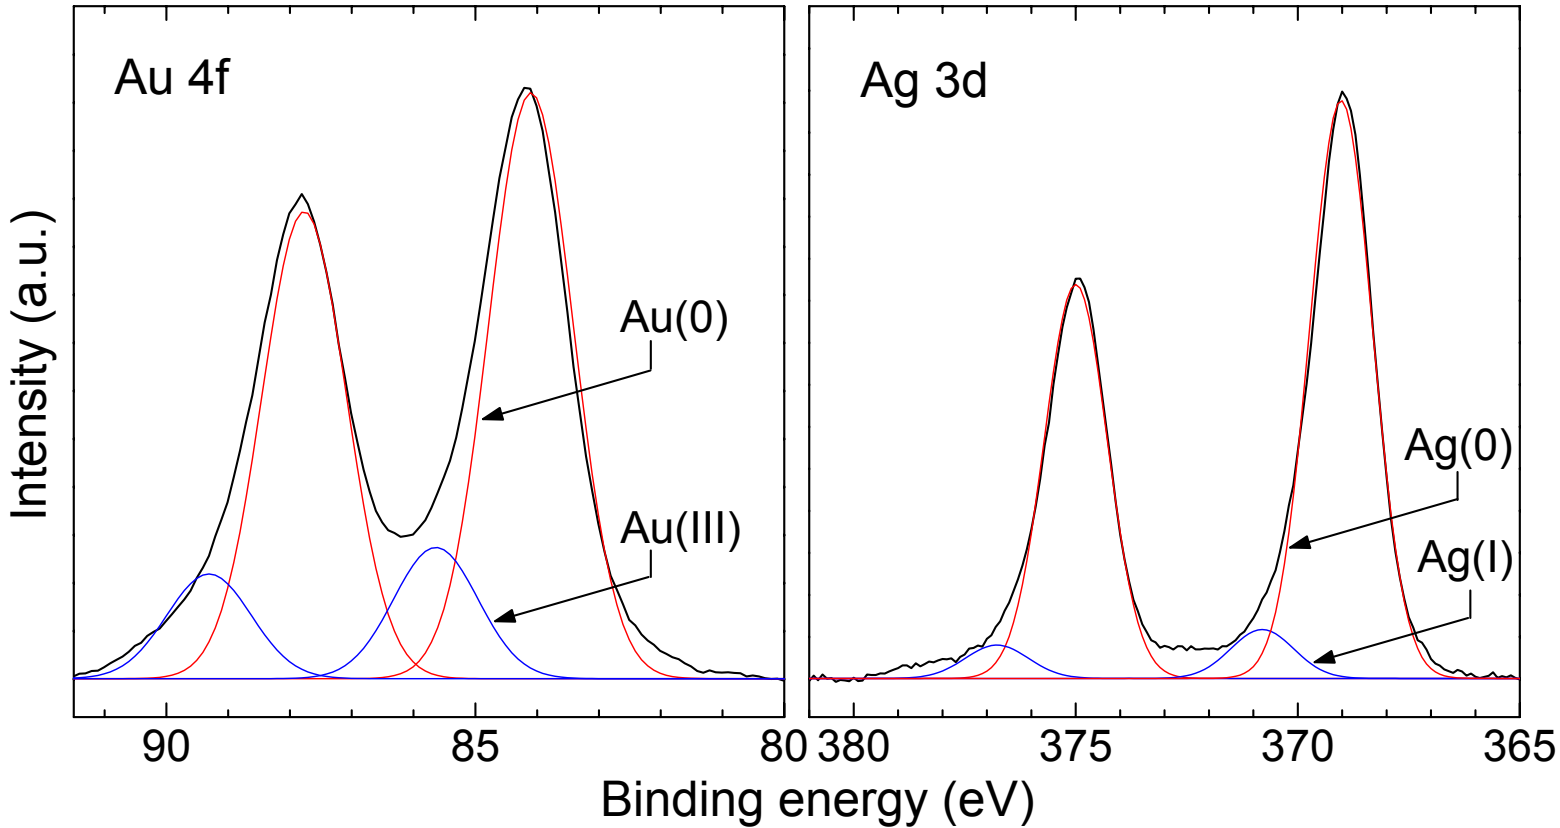

Supplement: b414447n.pdf [file b414447n.pdf]
